# Supplementary material
Source: Springer Nature journal article supplement (https://www.springermedizin.de/resource/supplementary/12874_2009_421_MOESM1_ESM.pdf/9432058)

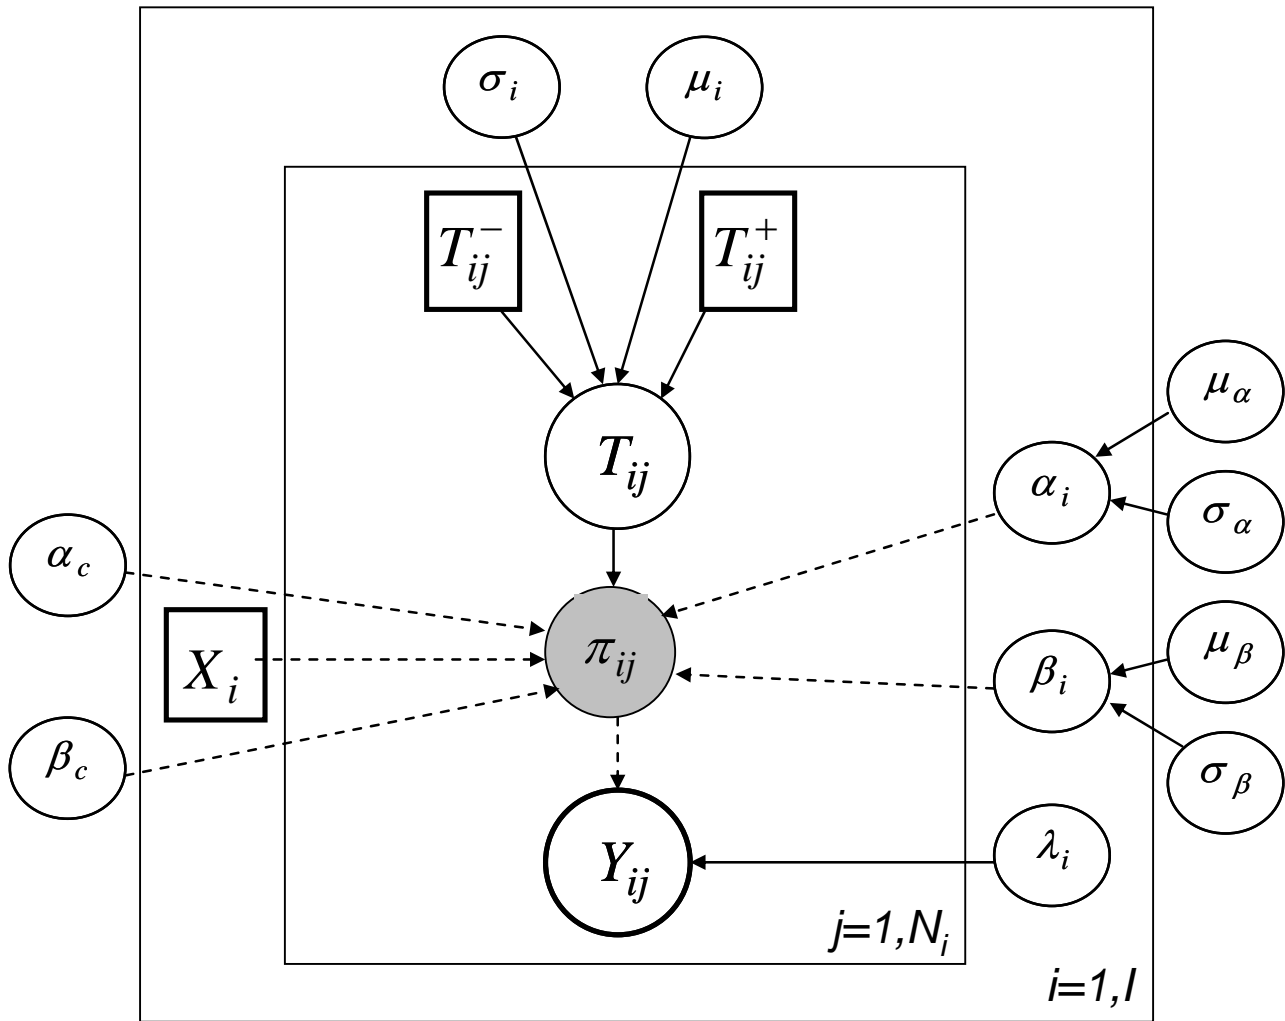

Supplement: MOESM1 [file 9432058]
